# Supplementary material for: Clinical Trends in Management of Locally Advanced ESCC: Real-World Evidence from a Large Single-Center Cohort Study
Source: MDPI journal article supplement (doi:10.3390/cancers14194953), 2022-10-10
Supplement: s1 [file s1]

**Supplement Table.** Stratified multivariate Cox proportional-hazard model by stage and type of treatment

| Stage | Variables                          | Hazard Ratio [95% CI] | P-value        |
|-------|------------------------------------|-----------------------|----------------|
| T1-2  | Surgery only                       | Ref                   |                |
|       | Neoadjuvant CCRT with surgery      | 0.926 [0.635 - 1.352] | 0.691          |
|       | Surgery with adjuvant chemotherapy | 0.716 [0.496 - 1.033] | 0.074          |
|       | Definitive CCRT                    | 1.141 [0.628 - 2.073] | 0.666          |
| T3-4  | Surgery only                       | Ref                   |                |
|       | Neoadjuvant CCRT with surgery      | 0.704 [0.572 - 0.866] | < <b>0.001</b> |
|       | Surgery with adjuvant chemotherapy | 0.813 [0.632 - 1.047] | 0.109          |
|       | Definitive CCRT                    | 0.959 [0.732 - 1.255] | 0.758          |
| N0    | Surgery only                       | Ref                   |                |
|       | Neoadjuvant CCRT with surgery      | 0.769 [0.472 - 1.255] | 0.293          |
|       | Surgery with adjuvant chemotherapy | 0.337 [0.083 - 1.373] | 0.129          |
|       | Definitive CCRT                    | 0.726 [0.362 - 1.455] | 0.367          |
| N1-3  | Surgery only                       | Ref                   |                |
|       | Neoadjuvant CCRT with surgery      | 0.721 [0.594 - 0.875] | < <b>0.001</b> |
|       | Surgery with adjuvant chemotherapy | 0.649 [0.525 - 0.802] | < <b>0.001</b> |
|       | Definitive CCRT                    | 1.152 [0.886 - 1.497] | 0.29           |
| M0    | Surgery only                       |                       |                |
|       | Neoadjuvant CCRT with surgery      | 0.751 [0.622 - 0.907] | <b>0.003</b>   |
|       | Surgery with adjuvant chemotherapy | 0.715 [0.576 - 0.888] | <b>0.002</b>   |
|       | Definitive CCRT                    | 0.871 [0.653 - 1.162] | 0.348          |
| M1    | Surgery only                       | Ref                   |                |
|       | Neoadjuvant CCRT with surgery      | 0.869 [0.476 - 1.586] | 0.648          |
|       | Surgery with adjuvant chemotherapy | 0.557 [0.276 - 1.126] | 0.103          |
|       | Definitive CCRT                    | 1.678 [1.026 - 2.743] | 0.039          |
